# Supplementary material for: Comparison of Mineral, Metabolic, and Oxidative Profile of Saanen Goat during Lactation with Different Mediterranean Breed Clusters under the Same Environmental Conditions
Source: PubMed Central journal article supplement (PMC7175111; doi:10.3390/ani10030432), 2020-03-04
Supplement: animals-10-00432-s001.pdf [file animals-10-00432-s001.pdf]

# Supplementary Materials: Comparison of Mineral, Metabolic, and Oxidative Profile of Saanen Goat during Lactation with Different Mediterranean Breed Clusters under the Same Environmental Conditions

Carmen L. Manuelian <sup>1</sup>, Aristide Maggiolino <sup>2,\*</sup>, Massimo De Marchi <sup>1</sup>, Salvatore Claps <sup>3</sup>, Luigi Esposito <sup>4</sup>, Domenico Rufrano <sup>3</sup>, Elisabetta Casalino <sup>2</sup>, Alessandra Tateo <sup>2</sup>, Gianluca Neglia <sup>4</sup> and Pasquale De Palo <sup>2</sup>

<sup>1</sup> Department of Agronomy, Food, Natural resources, Animals and Environment, University of Padova, Viale dell'Università 16, 35020 Legnaro, Italy; carmenloreto.manuelianfuste@unipd.it (C.L.M.); massimo.demarchi@unipd.it (M.D.M.);

<sup>2</sup> Department of Veterinary Medicine, University of Bari Aldo Moro, Casamassima km 3, 70010 Valenzano, Italy; elisabetta.casalino@uniba.it (E.C.); alessandra.tateo@uniba.it (A.T.); pasquale.depalo@uniba.it (P.D.P);

<sup>3</sup> Council for Agricultural Research and Agricultural Economy Analysis - Research Centre for Animal Production and Aquaculture, S.S.7 Via Appia, 85051 Bella Muro, Italy; salvatore.claps@crea.gov.it (S.C.); drufrano@tiscali.it (D.R);

<sup>4</sup> Department of Veterinary Medicine and Animal Production (DMVPA), University of Naples Federico II, Naples, Via Federico Delpino 1, 80137 Napoli, Italy; luigespo@unina.it (L.E.) neglia@unina.it (G.N.);

\* Correspondence: aristide.maggiolino@uniba.it; Tel.: +39-0805449915

Received: 17 February 2020; Accepted: 27 February 2020; Published: date

**Table S1.** Monthly pasture botanical composition during Winter (February-March), Spring (April, May, June), Summer (July, August), Autumn (September, October).

|                             | Winter     | Spring     | Summer    | Autumn     |
|-----------------------------|------------|------------|-----------|------------|
| <i>Medicago polymorfa</i>   | 45.2 ± 8.6 | 18.9 ± 6.4 | 9.8 ± 2.3 | 12.1 ± 3.1 |
| <i>Lolium perenne</i>       | 20.6 ± 5.2 | 17.1 ± 3.2 | 4.3 ± 0.7 | 14.3 ± 3.7 |
| Bromus spp.                 | 7.1 ± 2.2  | 4.4 ± 1.1  | 0         | 2.2 ± 0.5  |
| <i>Dactylis glomerata</i>   | 4.4 ± 1.1  | 4.4 ± 1.0  | 2.2 ± 0.7 | 0          |
| <i>Phleum pratense</i>      | 4.4 ± 0.8  | 0          | 0         | 2.2 ± 0.5  |
| <i>Agrostis stolonifera</i> | 3.3 ± 0.7  | 5.5 ± 1.3  | 1.1 ± 0.2 | 2.2 ± 0.5  |
| <i>Festuca arundinacea</i>  | 2.3 ± 0.8  | 2.2 ± 0.5  | 0         | 8.8 ± 2.3  |
| <i>Aspp.erula odorata</i>   | 2.2 ± 0.4  | 3.3 ± 0.8  | 2.2 ± 0.5 | 0          |
| Geranium spp..              | 2.1 ± 0.5  | 6.5 ± 1.6  | 0         | 2.2 ± 0.5  |
| Trifolium spp.              | 1.3 ± 0.3  | 3.3 ± 0.8  | 2.2 ± 0.5 | 18.1 ± 4.9 |
| <i>Cichorium intybus</i>    | 1.2 ± 0.3  | 2.2 ± 0.5  | 7.4 ± 1.8 | 3.3 ± 0.8  |
| <i>Muscari neglectum</i>    | 1.2 ± 0.3  | 1.1 ± 0.2  | 0         | 1.1 ± 0.2  |
| <i>Ranunculus bulbosum</i>  | 1.2 ± 0.3  | 2.2 ± 0.5  | 1.1 ± 0.2 | 0          |
| Rumex spp.                  | 1.0 ± 0.2  | 1.1 ± 0.2  | 1.1 ± 0.2 | 4.2 ± 0.8  |
| <i>Veronica persica</i>     | 0.8 ± 0.2  | 1.1 ± 0.2  | 0         | 0          |
| <i>Avena barbata</i>        | 0          | 3.3 ± 0.8  | 1.1 ± 0.2 | 0          |
| <i>Hordeum vulgare</i>      | 0          | 2.7 ± 0.7  | 0         | 0          |
| <i>Borago officinalis</i>   | 0          | 2.7 ± 0.7  | 0         | 0          |
| Plantago spp.               | 1.7 ± 0.4  | 2.7 ± 0.5  | 2.7 ± 0.7 | 4.3 ± 1.3  |
| <i>Poa pratensis</i>        | 0          | 1.8 ± 0.4  | 0         | 0          |

|                             |   |           |            |           |
|-----------------------------|---|-----------|------------|-----------|
| <i>Vicia sativa</i>         | 0 | 1.8 ± 0.5 | 0          | 0         |
| <i>Foeniculum vulgare</i>   | 0 | 1.8 ± 0.4 | 3.6 ± 0.9  | 3.4 ± 0.7 |
| <i>Galium verum</i>         | 0 | 1.8 ± 0.3 | 1.8 ± 0.4  | 0         |
| <i>Mentha arvensis</i>      | 0 | 1.8 ± 0.3 | 2.7 ± 0.7  | 0         |
| <i>Lotus corniculatus</i>   | 0 | 0.9 ± 0.3 | 1.8 ± 0.4  | 0         |
| <i>Melilotus sulcatus</i>   | 0 | 0.9 ± 0.1 | 1.8 ± 0.4  | 4.5 ± 1.0 |
| Crepis spp..                | 0 | 0.9 ± 0.2 | 6.3 ± 1.1  | 0         |
| Chrysanthemum spp.          | 0 | 0.9 ± 0.2 | 1.8 ± 0.3  | 0         |
| <i>Daucus carota</i>        | 0 | 0.9 ± 0.2 | 3.6 ± 1.2  | 3.6 ± 0.8 |
| <i>Malva sylvestris</i>     | 0 | 0.9 ± 0.2 | 0.9 ± 0.1  | 0.9 ± 0.2 |
| <i>Picris</i> spp.          | 0 | 0.9 ± 0.2 | 15.3 ± 3.7 | 0         |
| <i>Polygonum aviculare</i>  | 0 | 0         | 9.9 ± 2.4  | 0         |
| <i>Cinorosus cristatus</i>  | 0 | 0         | 2.7 ± 0.6  | 2.7 ± 0.6 |
| <i>Convonvolus arvensis</i> | 0 | 0         | 2.7 ± 0.6  | 0         |
| <i>Salvia viridis</i>       | 0 | 0         | 2.7 ± 0.6  | 0         |
| <i>Agropyron oelungatum</i> | 0 | 0         | 1.8 ± 0.4  | 1.8 ± 0.3 |
| <i>Lotus corniculatus</i>   | 0 | 0         | 1.8 ± 0.4  | 0         |
| <i>Centaurea</i> spp.       | 0 | 0         | 1.8 ± 0.44 | 0         |
| <i>Thymus vulgaris</i>      | 0 | 0         | 1.8 ± 0.4  | 2.7 ± 0.5 |
| <i>Sonchus</i> spp..        | 0 | 0         | 0          | 5.4 ± 1.2 |

Data reported as arithmetic mean ± standard deviation ( $n = 9$ ) in grams

**Table S2.** Monthly pasture chemical and nutritional composition during Winter (February-March), Spring (April, May, June), Summer (July, August), Autumn (September, October). arithmetic mean ± standard deviation;  $n = 9$ ).

|                             | Winter        | Spring        | Summer         | Autumn        |
|-----------------------------|---------------|---------------|----------------|---------------|
| Dry Matter (g/kg as fed)    | 247.6 ± 45.5  | 264 ± 52.8    | 490.8 ± 103.0  | 246.4 ± 39.4  |
| Organic Matter (g/kg DM)    | 896.9 ± 134.5 | 955.5 ± 124.2 | 926.8 ± 148.2  | 930.8 ± 158.2 |
| Crude protein (g/kg DM)     | 173.9 ± 22.8  | 225.6 ± 33.8  | 114.3 ± 17.1   | 163.8 ± 26.2  |
| Ether extract (g/kg DM)     | 27.8 ± 7.6    | 31.5 ± 8.5    | 20.1 ± 5.829.0 | 29.8 ± 8.9    |
| NDF (g/kg DM)               | 419.6 ± 26.9  | 461.2 ± 46.1  | 389.3 ± 38.9   | 393.4 ± 78.6  |
| ADF (g/kg DM)               | 356.2 ± 24.5  | 391.7 ± 39.1  | 329.4 ± 32.9   | 334.7 ± 66.9  |
| ADL (g/kg DM)               | 6.1 ± 2.6     | 5.4 ± 2.1     | 15.2 ± 4.5     | 12.8 ± 5.1    |
| Nutritive value (FUM/kg DM) | 0.81 ± 0.1    | 0.89 ± 0.1    | 0.65 ± 0.1     | 0.82 ± 0.1    |

FUM = feed units for milk; NDF = neutral detergent fiber; ADF = acid detergent fiber; ADL = acid detergent lignin; DM = dry matter

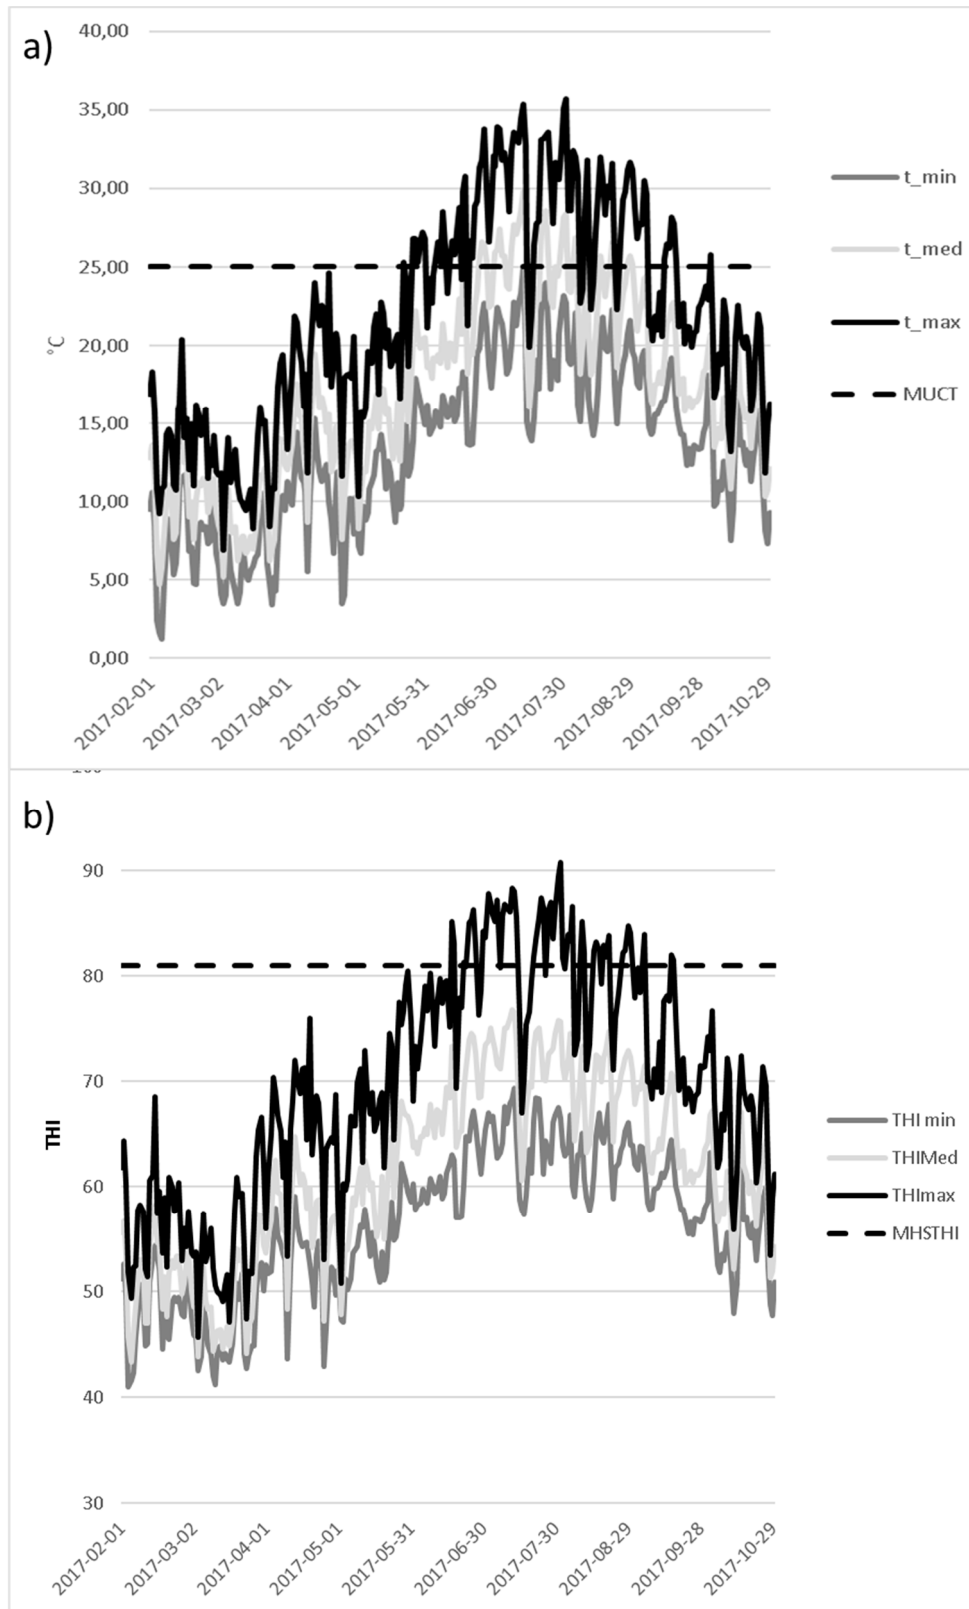

**Figure S1.** Daily maximum ( $t_{max}$ ), minimum ( $t_{min}$ ), and medium ( $t_{med}$ ) temperatures (a) and temperature humidity index (THI) values (b) during the trial period, with the indication of minimum upper critical temperature (MUCT) according to Lu [14] and moderate heat stress THI (MHSTHI) according to Sano et al.[15] , respectively.
